# Supplementary material for: Understanding the impact of delegated home visiting services accessed via general practice by community-dwelling patients: a realist review protocol
Source: PubMed Central journal article supplement (PMC6252761; doi:10.1136/bmjopen-2018-024876), 2018-11-13
Supplement: bmjopen-2018-024876.draft_revisions.pdf [file bmjopen-2018-024876.draft_revisions.pdf]

# BMJ Open

BMJ Open is committed to open peer review. As part of this commitment we make the peer review history of every article we publish publicly available.

When an article is published we post the peer reviewers' comments and the authors' responses online. We also post the versions of the paper that were used during peer review. These are the versions that the peer review comments apply to.

The versions of the paper that follow are the versions that were submitted during the peer review process. They are not the versions of record or the final published versions. They should not be cited or distributed as the published version of this manuscript.

BMJ Open is an open access journal and the full, final, typeset and author-corrected version of record of the manuscript is available on our site with no access controls, subscription charges or pay-per-view fees (<http://bmjopen.bmj.com>).

If you have any questions on BMJ Open's open peer review process please email [info.bmjopen@bmj.com](mailto:info.bmjopen@bmj.com)

# BMJ Open

## Understanding the impact of delegated home visiting services accessed via general practice by community dwelling patients: A realist review protocol

|                               |                                                                                                                                                                                                                                                                                                                                                                                                                                                                                                                                                                                                                                                                                                                                                                    |
|-------------------------------|--------------------------------------------------------------------------------------------------------------------------------------------------------------------------------------------------------------------------------------------------------------------------------------------------------------------------------------------------------------------------------------------------------------------------------------------------------------------------------------------------------------------------------------------------------------------------------------------------------------------------------------------------------------------------------------------------------------------------------------------------------------------|
| Journal:                      | <i>BMJ Open</i>                                                                                                                                                                                                                                                                                                                                                                                                                                                                                                                                                                                                                                                                                                                                                    |
| Manuscript ID                 | bmjopen-2018-024876                                                                                                                                                                                                                                                                                                                                                                                                                                                                                                                                                                                                                                                                                                                                                |
| Article Type:                 | Protocol                                                                                                                                                                                                                                                                                                                                                                                                                                                                                                                                                                                                                                                                                                                                                           |
| Date Submitted by the Author: | 20-Jun-2018                                                                                                                                                                                                                                                                                                                                                                                                                                                                                                                                                                                                                                                                                                                                                        |
| Complete List of Authors:     | <p>Abrams, Ruth; University College London Research Department of Epidemiology and Public Health, Primary Care and Population Health</p> <p>Wong, Geoffrey; University of Oxford, Nuffield Department of Primary Care Health Sciences</p> <p>Mahtani, Kamal; University of Oxford, Nuffield Department of Primary Health Care Sciences</p> <p>Tierney, Stephanie; University of Oxford, Nuffield Department of Primary Care Health Sciences</p> <p>Boylan, Anne-Marie; Oxford University, Nuffield Department of Primary Care Health Sciences</p> <p>Roberts, Nia; University of Oxford, UK, Bodleian Health Care Libraries, Park, Sophie; University College London Research Department of Epidemiology and Public Health, Primary Care and Population Health</p> |
| Keywords:                     | General Practice, Home visits, Delegation, PRIMARY CARE, Housebound, Realist Review                                                                                                                                                                                                                                                                                                                                                                                                                                                                                                                                                                                                                                                                                |
|                               |                                                                                                                                                                                                                                                                                                                                                                                                                                                                                                                                                                                                                                                                                                                                                                    |

SCHOLARONE™  
Manuscripts

1  
2  
3 **Understanding the impact of delegated home visiting services accessed via general**  
4  
5 **practice by community dwelling patients: A realist review protocol**  
6  
7

8 Abrams, R., Wong, G., Mahtani, K.R, Tierney, S, Boylan, A-M, Roberts, N, and Park, S.  
9

10  
11 *Corresponding author details:* Ruth Abrams  
12

13 Department of Primary Care & Population Health  
14

15 Institute of Epidemiology & Public Health  
16

17 UCL Medical School  
18

19 Royal Free Campus  
20

21 Rowland Hill St  
22

23 London, NW3 2PY  
24

25 Email: [r.abrams@ucl.ac.uk](mailto:r.abrams@ucl.ac.uk) Telephone: 0207 794 0500  
26  
27

28  
29  
30 *Co Author details:*  
31

32 Dr Geoff Wong, Nuffield Department of Primary Care Health Sciences, University of  
33 Oxford, Oxford, UK  
34

35  
36 Dr Kamal R. Mahtani, Nuffield Department of Primary Care Health Sciences, University of  
37 Oxford, Oxford, UK  
38

39  
40 Dr Stephanie Tierney, Nuffield Department of Primary Care Health Sciences, University of  
41 Oxford, Oxford, UK  
42

43  
44 Dr Anne-Marie Boylan, Nuffield Department of Primary Care Health Sciences, University of  
45 Oxford, Oxford, UK  
46

47  
48 Ms Nia Roberts, Bodleian Health Care Libraries, University of Oxford, Oxford, UK  
49

50  
51 Dr Sophie Park, Department of Primary care and population health, UCL, London, UK  
52

53 Keywords: General Practice; Home visits; Delegation; Primary care; Realist Review  
54

55  
56 Word Count: 4,120.  
57

58  
59 1  
60

## ABSTRACT

**Introduction:** In western countries, early visiting services (EVS) have been proposed as a recent intervention to reduce both GP workload and hospital admissions amongst housebound individuals experiencing a healthcare need within the community. EVS involves the delegation of the patient home visits to other staff groups such as paramedics or nursing staff. However, the principles of organising this care are unknown and it remains unclear how different contexts, such as patient conditions and the processes of organising EVS influence care outcomes. A review has been designed to understand how EVS are enacted and, specifically, who benefits, why, how and when in order to provide further insight into the design and delivery of EVS.

**Methods and analysis:** Protocol registered on PROSPERO CRD42018096518. The purpose of this review is to produce findings that provide explanations of how and why EVS contexts influence their associated outcomes. Evidence on EVS will be consolidated through realist review – a theory-driven approach to evidence synthesis. A realist approach is needed as EVS is a complex intervention. What EVS achieve is likely to vary for different individuals and contexts. We expect to synthesise a range of relevant data such as qualitative, quantitative and mixed-methods research in the following stages: devising an initial programme theory, searching evidence, selecting appropriate documents, extracting data, synthesising and refining the programme theory.

**Ethics and dissemination:** A formal ethics review is not required as this study is secondary research. Findings will be disseminated in a peer-reviewed journal, at national and international conferences and to relevant professional associations.

### Strengths and limitations of this study

- To our knowledge this is the first realist review to synthesise evidence and produce subsequent conceptualisations on the use and implementation of EVS.
- Undertaking a realist review enables us to understand the complexity of EVS and accounts for the different outcomes they cause under varying contexts, and makes our work potentially transferable.
- Stakeholder engagement during programme theory development accounts for a range of perspectives aiding this review's relevance for other professionals.
- Studies in only English language will be included.

## INTRODUCTION

### Background

Current practices within the NHS aim to reduce unnecessary hospital admissions because (1) current bed occupancy rates for general and acute settings are high, (2) emergency attendances and emergency admissions are increasing and (3) patient waiting times are increasing.[1] There is also a financial challenge to sustaining current healthcare practices, particularly in light of an ageing population with increasingly complex health conditions.[2] In particular, housebound individuals may find it challenging to access primary care at General Practice surgeries and have had to access emergency departments for alternative care solutions.[3-5] This places a strain on emergency departments and may lead to an increased likelihood of hospitalisation, particularly in older adults, which may be detrimental to their overall wellbeing in the longer term.[6]

In addition to increased patient demand, difficulties in General Practice recruitment and retention means that General Practitioners (GPs) are currently facing a number of hurdles in terms of workload.[7] As such, the opportunity for GPs to provide visits to housebound patients is challenging and data indicates that GP home visit rates are decreasing in many European and Northern America countries.[8-9]

One possible way to reduce the pressures GPs face and provide access (especially for housebound patients) to care, is to delegate patient home visits to other staff groups such as paramedics, physician assistants or nursing staff.[10-11] Delegating GP home visits to other staff groups may improve the accessibility and timeliness of care received.[12] As such, early visiting services (EVS) has been proposed and piloted as a possible intervention (NHS, 2018).[13]

## The nature of EVS

Whether a GP decides to delegate a visit may depend on a number of factors. For example, patients may present with a clear cut acute need that is untreatable at home and inevitably requires a hospital admission (for example, in the case of a myocardial infarction or stroke). GP workload, practice location and GP tolerance of patient discomfort are also factors that affect the likelihood of a home visit being delegated.[9]

GPs are more likely to delegate a visit if they perceive it will save them time and contribute to patient health.[10] Positive GP perceptions about the delegation of home visits to other staff members has been reported as acceptable in a number of studies. For example staff perceived as acceptable include nurses;[11, 14] emergency care practitioners[15] and physician assistants.[10]

Yet, EVS may vary in its purpose and delivery. Our initial scoping and discussions with stakeholders have identified a variety of ways in which an EVS is described and used. As such, this intervention may come at different points in a patient's care pathway ranging from preventative to acute, depending on patient needs.[16]

### EVS: A preventative measure

Some define EVS as an 'early' preventative measure to provide routine care in a patient's home and minimise subsequent deterioration. Typically this includes supporting individuals at risk from a chronic condition such as Chronic Obstructive Pulmonary Disease, diabetes, dementia or frailty. Patients with chronic conditions may be offered interventions such as geriatric assessments, falls prevention, dietary intervention and/or medication review.[17]

These have all been shown to have a positive effect on the assessment and management of physical functioning; psychosocial functioning; falls; hospital admission and mortality,

1  
2  
3 particularly amongst the elderly.[18-19] However, extant research into the effectiveness of  
4  
5 preventative home visits within primary care has frequently been cited as inconclusive.[17-  
6  
7 19] The associated benefits of home visits and their ability to offer anything conclusive is  
8  
9 affected by the differences in intervention components and delivery methods.[20] Moreover,  
10  
11 randomised control trials (RCTs) have shaped the way in which home visit effectiveness has  
12  
13 been examined, which has led to a neglected understanding of their justification and  
14  
15 benefit,[21] particularly in relation to contextual factors.

16  
17  
18  
19 EVS: An 'earlier in the day' intervention

20  
21  
22 The second way in which the term EVS has been used is as a responsive intervention to  
23  
24 ensure patients have access to care earlier in the day. This assumes that by having patients  
25  
26 seen earlier in the day, EVS visits act either as preventative of hospital admissions and  
27  
28 overnight stays or enable a patient to be admitted earlier in the day, evening out the flow of  
29  
30 work at hospitals. When delegated, GP workload is also thought to be reduced by removing  
31  
32 the need to fit in a home visit.[22] Therefore greater efficiency in processing a patient  
33  
34 through the healthcare system is emphasised.

35  
36  
37 The organisation of GP workload however, is likely to vary across practices and inevitably  
38  
39 impact on when a home visit might be undertaken. Some practices may have access to a duty  
40  
41 doctor throughout the day or position home visits after morning surgery. Moreover, relatively  
42  
43 few studies have examined access to GP services and their associated hospital admission  
44  
45 route.[3]

46  
47  
48  
49 EVS: An acute same day service

50  
51  
52 The third way in which EVS has been described is for patients with an acute, same day  
53  
54 need.[13] An acute need can be defined as a condition with a finite duration[23] such as acute  
55  
56  
57



1  
2  
3 injury, acute exacerbation of chronic disease and acute minor illness that prevents them from  
4  
5 accessing traditional GP services.[11] However, the process of decision making about a  
6  
7 patient's care in an acute context is complex, with professional and patient thresholds of risk  
8  
9 likely to be variable[24]or reliant on the medical autonomy of the qualified professional  
10  
11 treating the patient.[25]  
12

13  
14 This different conceptualisation indicate that our current understanding of EVS is poor.  
15  
16 Descriptions of the purpose and way EVS is provided differ and at present it is unclear what  
17  
18 outcomes EVS might achieve, how, why, for whom and in what contexts. Thus consolidation  
19  
20 of the evidence regarding EVS is now required.  
21  
22

## 23 24 **METHODS**

### 25 26 27 **Review aim, questions and objectives**

#### 28 29 30 **Aim**

31  
32 This review aims to improve our understanding of the ways in which (i.e. how, why and in  
33  
34 what contexts) EVS impact (or not) on hospital admissions, GP workload and patient health  
35  
36 within primary care settings.  
37  
38

#### 39 40 **Review objectives**

- 41  
42
- 43 1. To conduct a realist review to understand the ways in which EVS impact upon the  
44  
45 healthcare needs of community dwelling patients. This will be done with (i) engagement with  
46  
47 a diverse range of literature, (ii) the development of a programme theory and (iii) feedback  
48  
49 and advice from stakeholders experienced in the field.  
50  
51
  - 52 2. To produce recommendations that guide the implementation and commissioning of EVS  
53  
54 within primary care.  
55  
56

1  
2  
3 Review research questions:  
4

5  
6 Within the existing and available literature, what are the causal explanations for the ways in  
7  
8 which primary care EVS contribute to patient care and clinical workload?  
9

10  
11 *Sub Questions:*  
12

- 13  
14 1. What are the outcomes from EVS?  
15  
16 2. What are the mechanisms, acting at individual, group, professional and/or organisational  
17  
18 levels, through which EVS result in their outcomes?  
19  
20 3. What are the contexts which determine whether the different mechanisms produce their  
21  
22 outcomes?  
23  
24  
25

## 26 27 **STUDY DESIGN** 28

29  
30 Our review design is based on the work of Pawson et al[26]and the project protocol by  
31  
32 Carrieri et al[27]and Weetman et al.[28]It takes a realist approach, viewing causation as a  
33  
34 generative process - where outcomes are caused by context sensitive mechanisms.[26] We  
35  
36 have conceptualised EVS as a complex intervention that has outcomes which are context  
37  
38 sensitive. Therefore our review approach will enable us to identify and understand the  
39  
40 contexts in which the outcomes of EVS may or may not be effective.  
41  
42

43  
44 A realist review is able to synthesise a range of relevant data such as qualitative, quantitative  
45  
46 and mixed-methods research, as well as grey literature. Realist reviews move beyond a  
47  
48 description of literature by using an interpretive, theory-driven approach to analysing data  
49  
50 from such diverse literature sources. Findings from our realist review are potentially  
51  
52 transferable because we will focus on the mechanisms that cause particular EVS outcomes.  
53  
54  
55  
56  
57

1  
2  
3 This may enable us to produce recommendations likely to be useful across the NHS and  
4  
5 possibly further afield.  
6

## 7 Patient and Public Involvement

8  
9  
10 The realist review protocol is registered with PROSPERO (CRD42018096518) and  
11  
12 incorporates iterative cycles of engagement with the literature and with our Stakeholder  
13  
14 Group. Our Stakeholders comprise of a group of individuals involved in the undertaking or  
15  
16 organisation of EVS including CCG members, emergency care practitioners and GPs. These  
17  
18 individuals were identified from internet searches of General Practices running EVS, or  
19  
20 professional networks of the authors and invited to have an informal conversation about the  
21  
22 operationalisation of EVS at their practice. Stakeholder engagement facilitates the unique  
23  
24 provision of advice, feedback and diverse perspectives. Thus far it has helped us to  
25  
26 understand how EVS are carried out in practice and the impact they are expected to have on  
27  
28 care quality in primary care settings. This has aided our initial identification of appropriate  
29  
30 documents to draw on such as localised EVS evaluations. It has also contributed to the  
31  
32 development of our review's inclusion and exclusion criteria. As this review develops we will  
33  
34 engage at regular intervals with our stakeholder group to build our understanding of how  
35  
36 mechanisms operating at the individual, group, professional and/or organisational levels  
37  
38 produce context dependent outcomes from EVS (see also Step Six). Patients are not involved  
39  
40 in this review.  
41  
42  
43  
44  
45

## 46 **Step One: Locating existing theories**

47  
48  
49 The first step in a realist review is to undertake an initial scoping search to identify theories  
50  
51 that begin to explain and develop our understanding of EVS. The importance of this stage is  
52  
53 to make visible the underpinning assumptions about why certain components and processes  
54  
55 of EVS are required, to get to the one or more desired outcomes.[29]  
56  
57

1  
2  
3 In the first instance these theories will be located in the following ways: (1) iteratively  
4 drawing on exploratory searches of relevant literature and (2) consulting with key content  
5 experts who are active in the implementation or use of EVS as part of our stakeholder group  
6 engagement. Exploratory literature searches will predominantly use grey literature as a  
7 primary source of information- for example we will focus on policy and service documents  
8 produced by NHS England and/or Clinical Commissioning Groups on EVS. These  
9 documents will be interrogated for theories relating to the practice of EVS and their intended  
10 outcomes. This stage is not meant to be exhaustive but instead acts to provide an initial  
11 programme theory foundation. Where detail is lacking, we will endeavour to 'fill in the gaps'  
12 later on in the review.  
13  
14  
15  
16  
17  
18  
19  
20  
21  
22  
23  
24

25 Secondly, the development of a relevant programme theory will incorporate the iterative  
26 discussions within the project team. Regular meetings will be held with the aim of building,  
27 sense-making and synthesising a range of different theories into an initial programme theory.  
28 Literature, stakeholder engagement and project team discussions, along with the contents of  
29 our initial programme theory will all inform the development of an appropriate,  
30 comprehensive search strategy to be used in step two.  
31  
32  
33  
34  
35  
36  
37  
38

### 39 **Step Two: Searching for evidence**

40  
41  
42 Step two involves one or more formal searches informed by our initial programme theory  
43 from step one. Its goal is to identify extant literature that will be able to further inform the  
44 development of a more detailed programme theory. The process of designing, piloting and  
45 conducting the formal searches will be done with the support of an information specialist.  
46  
47  
48  
49  
50 Any modifications made to the search strategies following the pilot will be documented and  
51 implemented across source types.  
52  
53  
54  
55  
56  
57  
58  
59  
60

1  
2  
3 The use of the following databases is anticipated: MEDLINE, EMBASE, The Cochrane  
4 Library (Cochrane Database of Systematic Reviews, Cochrane Central Register of Controlled  
5 Trials (CENTRAL), Cochrane Methodology Register) and SCOPUS. Any other databases  
6 identified by the information specialist as relevant will be incorporated. Forward citation  
7 searches and searching the citations contained in the reference lists of relevant documents  
8 will also be undertaken. The terminology, syntax and search structure will be informed by  
9 step one (i.e. stakeholder collaboration, consultation with preliminary literature and initial  
10 programme theory). However we anticipate using the following search terms for EVS within  
11 General Practice: delegate\*, home visit\* and house calls. Subject headings relevant to each  
12 database will also be used, for example, MeSH for MEDLINE. Grey literature such as  
13 evaluations, reports, websites, news articles and leaflets that offer useful contextual and/or  
14 conceptual information will also be used.  
15  
16  
17  
18  
19  
20  
21  
22  
23  
24  
25  
26  
27

## 28 29 Screening

30  
31 All screening will be undertaken by RA. Initially this will comprise screening of title, abstract  
32 and keywords. We will use the following inclusion criteria to determine if a document is  
33 likely to contain relevant data:  
34  
35  
36  
37

- 38  
39 ● Delegated home visiting services within General Practice and its impact on  
40 individuals and/or service organisations with a healthcare need. By delegation we are  
41 predominantly referring to the range of qualified staff able to undertake a home visit  
42 such as other GPs, advanced nurse practitioners, paramedics, nurses and emergency  
43 care practitioners.  
44  
45  
46  
47  
48  
49
- 50 ● Document type: all study designs and documents that indicate they may contain  
51 relevant data.  
52  
53  
54  
55  
56  
57

- Types of participants: documents that include housebound (long term and short term) individuals with a healthcare need living within the community.
- Types of intervention: early visiting services; primary care visiting services; acute home visiting services accessed via General Practice within normal surgery hours (8.00-18.30).
- Outcome measures: GP workload, hospital admissions, patient health and/or satisfaction.

During the screening process, documents will be excluded if they relate to any of the following areas as these are outside the role of EVS as defined in the literature:

- Documents relating to home visiting to children as part of routine child health surveillance and maternity at home services
- Documents relating to specialist provision of end of life/ palliative care
- Documents relating to visits provided by out of hours GP co-operatives; out of hours services; (private) social care home visits; extended hours hubs; community-based services not accessed via general practice (e.g. routine district nurse, community-based services)

A random sub sample (10%) of the retrieved citations will be allocated and reviewed independently by SP to ensure consistency in the screening processes. Discussions will take place between RA and SP for any disagreements regarding the citations. For issues that cannot be resolved, the wider project team will be consulted.

#### *Additional searching*

As the aim of the realist review is to include a broad range of documents to further inform the development of the programme theory, looking across disciplines, for example in relation to the staffing of EVS is anticipated. Additional searches may be undertaken if there is a gap in

our understanding during the refinement of the programme theory. Any additional searches that are undertaken will be discussed with the project team, in order to identify and agree on refined inclusion and exclusion criteria.

### **Step Three: Document selection**

The selection of documents will be made in relation to their relevance (contribution to programme theory development and refinement) and rigour (credibility and trustworthiness of methods used to generate the data).[29] Documents relating to delegated home visiting services undertaken in circumstances that closely resemble the UK (i.e. publicly funded healthcare setting) will be initially prioritised for inclusion and analysis. Studies from other countries with alternative healthcare structures may be drawn on later to ensure we do not miss important contributions. Using a similar criteria to Carrieri[27]we define these two distinctions as having the ability to provide major and minor contributions. Document inclusion criteria for major contributions includes:

- Documents which contribute to the research questions and are conducted in the NHS.
- Documents which contribute to the research questions and are conducted in circumstances (e.g. publicly funded healthcare systems) with similarities to the NHS.
- Documents which contribute to the research questions and can clearly help to identify mechanisms which could plausibly operate in the circumstances of the NHS (e.g. delegated home visiting services, within hours, to patients with a healthcare need, living within the community).

Minor contributions include:

- Documents conducted in healthcare systems that are markedly different to the NHS (e.g. fee-for service and private insurance scheme systems) but where the mechanisms could plausibly operate in the circumstances of the NHS.

1  
2  
3 This process, and ensuing discussions will enable reviewers to focus on data extraction and  
4 analysis of papers that provide a conceptually rich contribution whilst still including  
5 documents that are less conceptually rich. Decisions made regarding these classifications will  
6  
7 be discussed by RA and SP using a random 10% selection of articles.  
8  
9

#### 10 11 **Step Four: Data extraction**

12  
13  
14 Extraction of the data will be two-fold. Firstly, document characteristics and details will be  
15 extracted into an Excel spreadsheet with the aim of providing a descriptive overview of the  
16 documents included. Secondly, documents selected for inclusion will be uploaded into NVivo  
17 and coded. Details of the analytic processes may be found in step five (data synthesis). Data  
18 extraction will also be undertaken by RA and 10% of extracted data will be reviewed  
19 independently for consistency by another member of the team. Discussions will take place  
20 around any disagreements and extended to the project team where a resolution cannot be  
21 found. This process will be documented and the outcomes recorded.  
22  
23  
24  
25  
26  
27  
28  
29  
30  
31

#### 32 **Step Five: Data synthesis**

33  
34  
35 The aim of data synthesis in realist review is to consolidate the data from previous steps to  
36 refine the initial programme theory. Data analysis and synthesis will involve the use of a  
37 realist logic analysis with the goal of using the data from the literature (i.e. documents) to  
38 further develop the initial programme theory. Analysis requires interpretation and judgement  
39 of data. Data coding will be deductive (informed by our initial programme theory), inductive  
40 (come from the data within documents) and retroductive (where inferences are made based  
41 on interpretations of the data within documents about underlying causal processes – i.e.  
42 mechanisms). We will use a series of questions about the relevance and rigour of content  
43 within documents as part of our process of analysis, as set out below:  
44  
45  
46  
47  
48  
49  
50  
51  
52  
53  
54  
55  
56  
57  
58  
59  
60



- 1  
2  
3 ● Relevance: Are sections of text within this document relevant to programme theory  
4 development?  
5  
6
- 7  
8 ● Rigour (judgements about trustworthiness): Are these data sufficiently trustworthy to  
9 warrant making changes to any aspect of the programme theory?  
10  
11
- 12  
13 ● Interpretation of meaning: If the section of text is relevant and trustworthy enough, do  
14 its contents provide data that may be interpreted as functioning as context, mechanism  
15 or outcome?  
16  
17
- 18  
19 ● Interpretations and judgements about Context-Mechanism-Outcome-Configurations:  
20 What is the Context-Mechanism-Outcome-Configuration (CMOC) (partial or  
21 complete) for the data that may be interpreted as functioning as context, mechanism  
22 or outcome? Is there further data to inform this particular CMOCs contained within  
23 this document or other documents? If so, which other documents? How does this  
24 particular CMOC relate to other CMOCs that have already been developed?  
25  
26
- 27  
28 ● Interpretations and judgements about programme theory: How does this particular  
29 (full or partial) CMOC relate to the programme theory? Within this same document  
30 are there data which informs how the CMOC relates to the programme theory? If not,  
31 is there data in other documents? Which ones? In light of this particular CMOC and  
32 any supporting data, does the programme theory need to be changed?  
33  
34  
35  
36  
37  
38  
39  
40  
41  
42  
43  
44

45 Data to inform our interpretation of the relationships between contexts, mechanisms and  
46 outcomes will be sought not just within the same document, but across documents (e.g.  
47 mechanisms inferred from one document could help explain the way contexts influenced  
48 outcomes in a different document). Synthesising data from different documents is often  
49  
50  
51  
52  
53  
54  
55  
56  
57

1  
2  
3 necessary to compile CMOCs, since not all parts of the configurations will always be  
4 articulated in the same document.  
5  
6

7  
8 Within the analytic process set out above, we will use interpretive cross-case comparison to  
9 understand and explain how and why observed outcomes have occurred, for example, by  
10 comparing interventions where EVS have been ‘successful’ against those which have not, to  
11 understand how context has influenced reported findings. When working through the  
12 questions set out above, where appropriate we will use the following forms of reasoning to  
13 make sense of the data and refine our programme theory:  
14  
15  
16  
17  
18  
19

- 20  
21 ● Juxtaposition of data: for example, where data about behaviour change in one  
22 document enables insights into data about outcomes in another document.  
23
- 24 ● Reconciling of data: where data differ in apparently similar circumstances, further  
25 investigation is appropriate in order to find explanations for why these differences  
26 have occurred.  
27
- 28 ● Adjudication of data: on the basis of methodological strengths or weaknesses.  
29
- 30 ● Consolidation of data: where outcomes differ in particular contexts, an explanation  
31 can be constructed of how and why these outcomes occur differently.  
32  
33  
34  
35  
36  
37  
38  
39  
40  
41

#### 42 **Step Six: Refine programme theory**

43  
44

45 The last stage in a realist review is the refinement and testing of the programme theory.[30]

46  
47 In order to sense-check this, it is advisable to include the expertise of those working in  
48 practice or those who can aid in the refinement of the final theory.[31] Therefore our final  
49 programme theory will be discussed with those undertaking EVS (e.g. GPs, emergency care  
50 practitioners, nurses) and/or those involved in their organisation (GPs, receptionists).  
51  
52  
53

54 Meetings will be organised with service users and providers to discuss the findings with the  
55  
56  
57

1  
2  
3 goal of asking for their input to develop recommendations that are relevant to them. The  
4  
5 active involvement of those involved in EVS is likely to improve how our findings support  
6  
7 practice recommendations.[28]If required, the review team will revisit parts of the review that  
8  
9 require re-scrutinising. This will be undertaken until no new information is provided by the  
10  
11 evidence or stakeholder involvement, essentially reaching theoretical saturation.[26]  
12  
13

14 This review will follow the Realist and Meta-Review Evidence Synthesis: Evolving  
15  
16 Standards (RAMESES) guidelines on quality and reporting.[32]  
17  
18

## 19 **ETHICS AND DISSEMINATION**

### 20 **Ethics**

21  
22  
23  
24  
25 Formal ethical approval is not required for this review as it is secondary research.  
26  
27

### 28 **Dissemination**

29  
30  
31 Ensuring that the outputs of this project are useful to the construction of best practice within  
32  
33 general practice and commissioning services is a key priority for us. Therefore, we will  
34  
35 produce relevant and appropriate outputs that target a range of audiences, in conjunction with  
36  
37 stakeholder consultation:  
38  
39

40  
41 1. Conventional academic forms. We aim to publish in a high-impact peer-reviewed journal  
42  
43 and also present this work at academic conferences. Our hope for this is to initiate a debate  
44  
45 about the use of EVS in primary care.  
46  
47

48  
49 2. Plain English summaries. We aim to provide meaningful summaries of this review's  
50  
51 findings as a method of continuous engagement with different audiences (e.g. doctors,  
52  
53 patients, commissioners and health services). We hope that this will provide an evidence-  
54  
55 based source that can be used to inform the practice and implementation of EVS.  
56  
57

1  
2  
3 Acknowledgements: We would like to thank our Stakeholder Group for their time and  
4  
5 contributions to the refining of our protocol.  
6  
7

8 Author contributions: RA, GW, KM and SP conceptualised the study. RA designed and wrote  
9  
10 the protocol manuscript. GW, KM, SP, ST,A-MB and NR contributed to protocol  
11  
12 development. GW provided methodological advice. GW and SP critically reviewed and  
13  
14 edited the manuscript. All authors read and approved the final manuscript.  
15  
16

17 Funding: The Evidence Synthesis Working Group is funded by the National Institute for  
18  
19 Health Research School for Primary Care Research (NIHR SPCR) [ProjectNumber 390]. The  
20  
21 views expressed are those of the author(s) and not necessarily those of the NIHR, the NHS or  
22  
23 the Department of Health.  
24  
25

26 Competing interests: KM is Chair, and GW is a Deputy Chair of the United Kingdom's  
27  
28 National Institute of Health Research Health Technology Assessment Primary Care Panel.  
29  
30  
31  
32  
33  
34  
35  
36  
37  
38  
39  
40  
41  
42  
43  
44  
45  
46  
47  
48  
49  
50  
51  
52  
53  
54  
55  
56  
57  
58  
59  
60

## REFERENCES

- 1 CQC. The state of care in NHS acute hospitals: 2014 to 2016. 2017  
[http://www.cqc.org.uk/sites/default/files/20170302b\\_stateofhospitals\\_web.pdf](http://www.cqc.org.uk/sites/default/files/20170302b_stateofhospitals_web.pdf) (accessed May 2018).
- 2 Christensen K, Doblhammer G, Rau R, et al. Ageing populations: the challenges ahead. *Lancet* 2009;374:1196-208.
- 3 Cowling TE, Harris M, Watt H, et al. Access to primary care and the route of emergency admission to hospital: retrospective analysis of national hospital administrative data. *BMJ Qual Saf* 2016;25:432-440.
- 4 Stall N, Nowaczynski M, Sinha SK. Systematic review of outcomes from home-based primary care programs for homebound older adults. *J Am Geriatr Soc* 2014;62:2243-2251.
- 5 Wajnberg A, Wang KH, Aniff M, et al. Hospitalizations and skilled nursing facility admissions before and after the implementation of a home-based primary care program. *J Am Geriatr Soc* 2010;58:1144-1147.
- 6 Sinha SK. Why the elderly could bankrupt Canada and how demographic imperatives will force the redesign of acute care service delivery. *Healthc Pap*. 2011;11:46-51.
- 7 Department of Health, Centre for Workforce Intelligence. In-depth review of the general practitioner workforce: final report. 2014  
[https://assets.publishing.service.gov.uk/government/uploads/system/uploads/attachment\\_data/file/507493/CfWI\\_GP\\_in-depth\\_review.pdf](https://assets.publishing.service.gov.uk/government/uploads/system/uploads/attachment_data/file/507493/CfWI_GP_in-depth_review.pdf) (accessed April 2018).
- 8 Theile G, Kruschinski C, Buck M, et al. Home visits- central to primary care, tradition or an obligation? A qualitative study. *BMC Family Practice* 2011;12:24-35.
- 9 Van den Berg MJ, Cardol M, Bongers FJM, et al. Changing patterns of home visiting in general practice: an analysis of electronic medical records. *BMC Family Practice* 2006;7:58-65.
- 10 Dini L, Sarganas G, Boostrom E, et al. German GPs' willingness to expand roles of physician assistants: a regional survey of perceptions and informal practices influencing uptake of health reforms in primary health care. *Family Practice* 2012;29:448-454.
- 11 Edwards M, Bobb C, Robinson SI. Nurse practitioner management of acute in-hours home visit or assessment requests: a pilot study. *Br J Gen Pract* 2009;59:7-11.
- 12 Van den Berg N, Heymann R, Meinke C, et al. Effect of the delegation of GP-home visits on the development of the number of patients in an ambulatory healthcare centre in Germany. *BMC Health Services Research* 2012;12:355-342.

- 1  
2  
3 13 NHS Oxfordshire CCG, Locality Place Based Primary Care Plan: Oxford City Locality.  
4 2018 [http://www.oxfordshireccg.nhs.uk/documents/work%20programmes/oxford-city-](http://www.oxfordshireccg.nhs.uk/documents/work%20programmes/oxford-city-locality-place-based-plan.pdf)  
5 [locality-place-based-plan.pdf](http://www.oxfordshireccg.nhs.uk/documents/work%20programmes/oxford-city-locality-place-based-plan.pdf) (accessed April 2018).  
6  
7 14 Jiwa M, Bakewell J, Foster S, et al. Primary care visits out-of hours. The case for skill  
8 mix? *J Community Nurs* 2001;15: 4–6.  
9  
10 15 Halter M, Marlow T, Mohammed D, et al. A patient survey of out-of-hours care provided  
11 by Emergency Care Practitioners. *BMC Emerg Med* 2007;7:4-11.  
12  
13 16 Purdy, S. Avoiding hospital admissions What does the research evidence say? *The Kings*  
14 *Fund*, 2010 [https://www.kingsfund.org.uk/sites/default/files/Avoiding-Hospital-Admissions-](https://www.kingsfund.org.uk/sites/default/files/Avoiding-Hospital-Admissions-Sarah-Purdy-December2010_0.pdf)  
15 [Sarah-Purdy-December2010\\_0.pdf](https://www.kingsfund.org.uk/sites/default/files/Avoiding-Hospital-Admissions-Sarah-Purdy-December2010_0.pdf) (accessed April 2018).  
16  
17 17 Liimatta H, Lampela P, Laitinen-Parkkonen P, et al. Effects of preventative home visits on  
18 older people's use and costs of health care services: A systematic review. *European Geriatric*  
19 *Medicine* 2016;7:571-580.  
20  
21 18 Bouman A, van Rossum E, Nelemans P et al. Effects of intensive home visiting programs  
22 for older people with poor health status: A systematic review. *BMC Health Services Research*  
23 2008;8:74-85.  
24  
25 19 van Haastregt JCM, Diederiks JPM, van Rossum E, et al. Effects of preventive home  
26 visits to elderly people living in the community: systematic review. *BMJ* 2000;320:754–8.  
27  
28 20 Mayo-Wilson E., Grant S, Burton J, et al. Preventive home visits for mortality, morbidity,  
29 and institutionalization in older adults: a systematic review and meta-analysis. *PLoS One*  
30 Published Online First: 12 March 2014 <https://doi.org/10.1371/journal.pone.0089257>.  
31  
32 21 Clark J. Preventive home visits to elderly people. *BMJ* 2001;323:708.  
33  
34 22 Moore P. GP pilot set to test if earlier home visits reduces admissions *Pulse* 2017  
35 [http://www.pulsetoday.co.uk/home/finance-and-practice-life-news/gp-pilot-set-to-test-if-](http://www.pulsetoday.co.uk/home/finance-and-practice-life-news/gp-pilot-set-to-test-if-earlier-home-visits-reduces-admissions/20035315.article)  
36 [earlier-home-visits-reduces-admissions/20035315.article](http://www.pulsetoday.co.uk/home/finance-and-practice-life-news/gp-pilot-set-to-test-if-earlier-home-visits-reduces-admissions/20035315.article) (accessed March 2018).  
37  
38 23 Royal College of General Practitioners, Care planning: improving the lives of people with  
39 long term conditions. London: Royal College of General Practitioners, 2011.  
40  
41 24 Jett DU, Grover L and Keck CP. A qualitative study of clinical decision making in  
42 recommending discharge placement from the acute care setting. *Phys Ther* 2003;83:224-236.  
43  
44 25 McDonald R, Waring J, and Harrison S. 'Balancing risk, that is my life': The politics of  
45 risk in a hospital operating theatre department. *Health, Risk and Society* 2005;7:397-411.  
46  
47 26 Pawson R, Greenhalgh T, Harvey G, et al. Realist review—a new method of systematic  
48 review designed for complex policy interventions. *J Health Serv Res Policy* 2005;10 Suppl  
49 1:21–34.  
50  
51  
52  
53  
54  
55  
56  
57  
58  
59

1  
2  
3 27 Carrieri D, Briscoe S, Jackson M et al. 'Care Under Pressure': a realist review of  
4 interventions to tackle doctors' mental ill-health and its impacts on the clinical workforce and  
5 patient care. *BMJ Open* 2018, 8:e021273. doi:10.1136/bmjopen-2017-021273[published  
6 Online First: 5 January 2018].  
7

8  
9 28 Weetman K, Wong G, Scott E et al. Improving best practice for patients receiving hospital  
10 discharge letters: a realist review protocol. *BMJ Open* 2017;7:1-7.  
11

12 29 Pawson R. Digging for Nuggets: how 'Bad' research can yield 'Good' Evidence - in -  
13 international journal of social research methodology. *Int J Soc Res Methodol* 2006;9:127-42.  
14

15 30 Pawson R, Greenhalgh T, Harvey G, et al. Realist Synthesis: An Introduction. 2004  
16 <http://discovery.ucl.ac.uk/180102/> (accessed March 2018).  
17

18 31 Wong G, Brennan N, Mattick K, et al. Interventions to improve antimicrobial prescribing  
19 of doctors in training: the IMPACT (IMProving Antimicrobial presCribing of doctors in  
20 Training) realist review. *BMJ Open* 2015;5:e009059 [published Online First: 22 October  
21 2015].  
22  
23

24 32 Wong G, Greenhalgh T, Westhorp G, et al. Development of methodological guidance,  
25 publication standards and training materials for realist and meta-narrative reviews: the  
26 RAMESES (Realist And Meta-narrative Evidence Syntheses - Evolving Standards) project.  
27 *Health Serv Deliv Res* 2014;2:1-251.  
28  
29  
30  
31  
32  
33  
34  
35  
36  
37  
38  
39  
40  
41  
42  
43  
44  
45  
46  
47  
48  
49  
50  
51  
52  
53  
54  
55  
56  
57  
58  
59  
60

# BMJ Open

## Understanding the impact of delegated home visiting services accessed via general practice by community dwelling patients: A realist review protocol

|                                 |                                                                                                                                                                                                                                                                                                                                                                                                                                                                                                                                                                                                                                                                                                                                         |
|---------------------------------|-----------------------------------------------------------------------------------------------------------------------------------------------------------------------------------------------------------------------------------------------------------------------------------------------------------------------------------------------------------------------------------------------------------------------------------------------------------------------------------------------------------------------------------------------------------------------------------------------------------------------------------------------------------------------------------------------------------------------------------------|
| Journal:                        | <i>BMJ Open</i>                                                                                                                                                                                                                                                                                                                                                                                                                                                                                                                                                                                                                                                                                                                         |
| Manuscript ID                   | bmjopen-2018-024876.R1                                                                                                                                                                                                                                                                                                                                                                                                                                                                                                                                                                                                                                                                                                                  |
| Article Type:                   | Protocol                                                                                                                                                                                                                                                                                                                                                                                                                                                                                                                                                                                                                                                                                                                                |
| Date Submitted by the Author:   | 21-Sep-2018                                                                                                                                                                                                                                                                                                                                                                                                                                                                                                                                                                                                                                                                                                                             |
| Complete List of Authors:       | Abrams, Ruth; University College London Research Department of Epidemiology and Public Health, Primary Care and Population Health<br>Wong, Geoffrey; University of Oxford, Nuffield Department of Primary Care Health Sciences<br>Mahtani, Kamal; University of Oxford, Nuffield Department of Primary Health Care Sciences<br>Tierney, Stephanie; University of Oxford, Nuffield Department of Primary Care Health Sciences<br>Boylan, Anne-Marie; Oxford University, Nuffield Department of Primary Care Health Sciences<br>Roberts, Nia; University of Oxford, UK, Bodleian Health Care Libraries, Park, Sophie; University College London Research Department of Epidemiology and Public Health, Primary Care and Population Health |
| <b>Primary Subject Heading</b>: | Health services research                                                                                                                                                                                                                                                                                                                                                                                                                                                                                                                                                                                                                                                                                                                |
| Secondary Subject Heading:      | General practice / Family practice, Health services research, Research methods, Qualitative research                                                                                                                                                                                                                                                                                                                                                                                                                                                                                                                                                                                                                                    |
| Keywords:                       | General Practice, Home visits, Delegation, PRIMARY CARE, Housebound, Realist Review                                                                                                                                                                                                                                                                                                                                                                                                                                                                                                                                                                                                                                                     |
|                                 |                                                                                                                                                                                                                                                                                                                                                                                                                                                                                                                                                                                                                                                                                                                                         |

SCHOLARONE™  
Manuscripts



1  
2  
3 **Understanding the impact of delegated home visiting services accessed via general**  
4 **practice by community dwelling patients: A realist review protocol**  
5  
6  
7

8 Abrams, R., Wong, G., Mahtani, K.R, Tierney, S, Boylan, A-M, Roberts, N, and Park, S.  
9

10  
11 *Corresponding author details:* Ruth Abrams  
12

13 Department of Primary Care & Population Health  
14

15 Institute of Epidemiology & Public Health  
16

17 UCL Medical School  
18

19 Royal Free Campus  
20

21 Rowland Hill St  
22

23 London, NW3 2PY  
24

25 Email: [r.abrams@ucl.ac.uk](mailto:r.abrams@ucl.ac.uk) Telephone: 0207 794 0500  
26  
27

28  
29  
30 *Co Author details:*  
31

32 Dr Geoff Wong, Nuffield Department of Primary Care Health Sciences, University of  
33 Oxford, Oxford, UK  
34

35  
36 Dr Kamal R. Mahtani, Nuffield Department of Primary Care Health Sciences, University of  
37 Oxford, Oxford, UK  
38

39  
40 Dr Stephanie Tierney, Nuffield Department of Primary Care Health Sciences, University of  
41 Oxford, Oxford, UK  
42

43  
44 Dr Anne-Marie Boylan, Nuffield Department of Primary Care Health Sciences, University of  
45 Oxford, Oxford, UK  
46

47  
48 Ms Nia Roberts, Bodleian Health Care Libraries, University of Oxford, Oxford, UK  
49

50  
51 Dr Sophie Park, Department of Primary care and population health, UCL, London, UK  
52

53  
54 Keywords: General Practice; Home visits; Delegation; Primary care; Realist Review  
55

56  
57 Word Count: 4,153.  
58

59  
60 1

## ABSTRACT

**Introduction:** In western countries, early visiting services (EVS) have been proposed as a recent intervention to reduce both GP workload and hospital admissions amongst housebound individuals experiencing a healthcare need within the community. EVS involves the delegation of the patient home visits to other staff groups such as paramedics or nursing staff. However, the principles of organising this care are unknown and it remains unclear how different contexts, such as patient conditions and the processes of organising EVS influence care outcomes. A review has been designed to understand how EVS are enacted and, specifically, who benefits, why, how and when in order to provide further insight into the design and delivery of EVS.

**Methods and analysis:** Protocol registered on PROSPERO CRD42018096518. The purpose of this review is to produce findings that provide explanations of how and why EVS contexts influence their associated outcomes. Evidence on EVS will be consolidated through realist review – a theory-driven approach to evidence synthesis. A realist approach is needed as EVS is a complex intervention. What EVS achieve is likely to vary for different individuals and contexts. We expect to synthesise a range of relevant data such as qualitative, quantitative and mixed-methods research in the following stages: devising an initial programme theory, searching evidence, selecting appropriate documents, extracting data, synthesising and refining the programme theory.

**Ethics and dissemination:** A formal ethics review is not required as this study is secondary research. Findings will be disseminated in a peer-reviewed journal, at national and international conferences and to relevant professional associations.

### Strengths and limitations of this study

- To our knowledge this is the first realist review to synthesise evidence and produce subsequent conceptualisations on the use and implementation of EVS.
- Undertaking a realist review enables us to understand the complexity of EVS and accounts for the different outcomes they cause under varying contexts, and makes our work potentially transferable.
- Stakeholder engagement during programme theory development accounts for a range of perspectives aiding this review's relevance for other professionals.
- Studies in only English language will be included.

## INTRODUCTION

### Background

Current practices within the NHS aim to reduce unnecessary hospital admissions because (1) current bed occupancy rates for general and acute settings are high, (2) emergency attendances and emergency admissions are increasing and (3) patient waiting times are increasing.[1] There is also a financial challenge to sustaining current healthcare practices, particularly in light of an ageing population with increasingly complex health conditions.[2] In particular, housebound individuals may find it challenging to access primary care at General Practice surgeries and have had to access emergency departments for alternative care solutions.[3-5] This places a strain on emergency departments and may lead to an increased likelihood of hospitalisation, particularly in older adults, which may be detrimental to their overall wellbeing in the longer term.[6]

In addition to increased patient demand, difficulties in General Practice recruitment and retention means that General Practitioners (GPs) are currently facing a number of hurdles in terms of workload.[7] As such, the opportunity for GPs to provide visits to housebound patients is challenging and data indicates that GP home visit rates are decreasing in many European and Northern America countries.[8-9]

One possible way to reduce the pressures GPs face and provide access (especially for housebound patients) to care, is to delegate patient home visits to other staff groups such as paramedics, physician assistants or nursing staff.[10-11] Delegating GP home visits to other staff groups may improve the accessibility and timeliness of care received.[12] As such, early visiting services (EVS) has been proposed and piloted as a possible intervention (NHS, 2018).[13]

## The nature of EVS

Whether a GP decides to delegate a visit may depend on a number of factors. For example, patients may present with a clear cut acute need that is untreatable at home and inevitably requires a hospital admission (for example, in the case of a myocardial infarction or stroke). GP workload, practice location and GP tolerance of patient discomfort are also factors that affect the likelihood of a home visit being delegated.[9]

GPs are more likely to delegate a visit if they perceive it will save them time and contribute to patient health.[10] Positive GP perceptions about the delegation of home visits to other staff members has been reported as acceptable in a number of studies. For example staff perceived as acceptable include nurses;[11, 14] emergency care practitioners[15] and physician assistants.[10]

Yet, EVS may vary in its purpose and delivery. Our initial scoping and discussions with stakeholders have identified a variety of ways in which an EVS is described and used. As such, this intervention may come at different points in a patient's care pathway ranging from preventative to acute, depending on patient needs.[16]

### EVS: A preventative measure

Some define EVS as an 'early' preventative measure to provide routine care in a patient's home and minimise subsequent deterioration. Typically this includes supporting individuals at risk from a chronic condition such as Chronic Obstructive Pulmonary Disease, diabetes, dementia or frailty. Patients with chronic conditions may be offered interventions such as geriatric assessments, falls prevention, dietary intervention and/or medication review.[17]

1  
2  
3 These have all been shown to have a positive effect on the assessment and management of  
4 physical functioning; psychosocial functioning; falls; hospital admission and mortality,  
5 particularly amongst the elderly.[18-19] However, extant research into the effectiveness of  
6 preventative home visits within primary care has frequently been cited as inconclusive.[17-  
7 19] The associated benefits of home visits and their ability to offer anything conclusive is  
8 affected by the differences in intervention components and delivery methods.[20] Moreover,  
9 randomised control trials (RCTs) have shaped the way in which home visit effectiveness has  
10 been examined. This has led to a neglected understanding of their justification and  
11 benefit,[21] particularly in relation to contextual factors (such as economic status), patient  
12 psycho-social factors (such as, for example social networks) and restricted outcome measures  
13 (e.g. mortality rates or function with a specific population).  
14  
15  
16  
17  
18  
19  
20  
21  
22  
23  
24  
25

26  
27 EVS: An 'earlier in the day' intervention  
28

29  
30 The second way in which the term EVS has been used is as a responsive intervention to  
31 ensure patients have access to care earlier in the day. This assumes that by having patients  
32 seen earlier in the day, EVS visits act either as preventative of hospital admissions and  
33 overnight stays or enable a patient to be admitted earlier in the day, evening out the flow of  
34 work at hospitals. When delegated, GP workload is also thought to be reduced by removing  
35 the need to fit in a home visit.[22] Therefore greater efficiency in processing a patient  
36 through the healthcare system is emphasised.  
37  
38  
39  
40  
41  
42  
43  
44  
45

46 The organisation of GP workload however, is likely to vary across practices and inevitably  
47 impact on when a home visit might be undertaken. Some practices may have access to a duty  
48 doctor throughout the day or position home visits after morning surgery. Moreover, relatively  
49 few studies have examined access to GP services and their associated hospital admission  
50 route.[3]  
51  
52  
53  
54  
55  
56  
57

1  
2  
3 EVS: An acute same day service  
4

5  
6 The third way in which EVS has been described is for patients with an acute, same day  
7  
8 need.[13] An acute need can be defined as a condition with a finite duration[23] such as acute  
9  
10 injury, acute exacerbation of chronic disease and acute minor illness that prevents them from  
11  
12 accessing traditional GP services.[11] However, the process of decision making about a  
13  
14 patient's care in an acute context is complex, with professional and patient thresholds of risk  
15  
16 likely to be variable[24]or reliant on the medical autonomy of the qualified professional  
17  
18 treating the patient.[25]  
19

20  
21 This different conceptualisation indicates that our current understanding of EVS is poor.

22  
23 Descriptions of the purpose and way EVS is provided differ and at present it is unclear what  
24  
25 outcomes EVS might achieve, how, why, for whom and in what contexts. Thus consolidation  
26  
27 of the evidence regarding EVS is now required.  
28  
29

## 30 31 **METHODS**

### 32 33 34 **Review aim, questions and objectives**

#### 35 36 37 **Aim**

38  
39  
40 This review aims to improve our understanding of the ways in which (i.e. how, why and in  
41  
42 what contexts) EVS impact (or not) on hospital admissions, GP workload and patient health  
43  
44 within primary care settings.  
45

#### 46 47 **Review objectives**

48  
49  
50 1. To conduct a realist review to understand the ways in which EVS impact upon the  
51  
52 healthcare needs of community dwelling patients. This will be done with (i) engagement with  
53  
54

1  
2  
3 a diverse range of literature, (ii) the development of a programme theory and (iii) feedback  
4  
5 and advice from stakeholders experienced in the field.  
6  
7

8 2. To produce recommendations that guide the implementation and commissioning of EVS  
9  
10 within primary care.  
11

12  
13 Review research questions:  
14

15  
16 Within the existing and available literature, what are the causal explanations for the ways in  
17  
18 which primary care EVS contribute to patient care and clinical workload?  
19  
20

21 *Sub Questions:*  
22

23  
24 1. What are the outcomes from EVS?  
25

26  
27 2. What are the mechanisms, acting at individual, group, professional and/or organisational  
28  
29 levels, through which EVS result in their outcomes?  
30

31  
32 3. What are the contexts which determine whether the different mechanisms produce their  
33  
34 outcomes?  
35

## 36 37 **STUDY DESIGN** 38

39  
40 Our review design is based on the work of Pawson et al[26]and the project protocol by  
41  
42 Carrieri et al[27]and Weetman et al.[28]It takes a realist approach, viewing causation as a  
43  
44 generative process - where outcomes are caused by context sensitive mechanisms.[26] We  
45  
46 have conceptualised EVS as a complex intervention that has outcomes which are context  
47  
48 sensitive. Therefore our review approach will enable us to identify and understand the  
49  
50 contexts in which the outcomes of EVS may or may not be effective.  
51

52  
53  
54 A realist review is able to synthesise a range of relevant data such as qualitative, quantitative  
55  
56 and mixed-methods research, as well as grey literature. Realist reviews move beyond a  
57

58  
59  
60 7



1  
2  
3 description of literature by using an interpretive, theory-driven approach to analysing data  
4  
5 from such diverse literature sources. Findings from our realist review are potentially  
6  
7 transferable because we will focus on the mechanisms that cause particular EVS outcomes.  
8  
9 This may enable us to produce recommendations likely to be useful across the NHS and  
10  
11 possibly further afield.  
12

### 13 14 Patient and Public Involvement 15

16  
17 The realist review protocol is registered with PROSPERO (CRD42018096518) and  
18  
19 incorporates iterative cycles of engagement with the literature and with our Stakeholder  
20  
21 Group. Our Stakeholders comprise of a group of individuals involved in the undertaking or  
22  
23 organisation of EVS including CCG members, emergency care practitioners and GPs. These  
24  
25 individuals were identified from internet searches of General Practices running EVS, or  
26  
27 professional networks of the authors and invited to have an informal conversation about the  
28  
29 operationalisation of EVS at their practice. Stakeholder engagement facilitates the unique  
30  
31 provision of advice, feedback and diverse perspectives. Thus far it has helped us to  
32  
33 understand how EVS are carried out in practice and the impact they are expected to have on  
34  
35 care quality in primary care settings. This has aided our initial identification of appropriate  
36  
37 documents to draw on such as localised EVS evaluations. It has also contributed to the  
38  
39 development of our review's inclusion and exclusion criteria. As this review develops we will  
40  
41 engage at regular intervals with our stakeholder group to build our understanding of how  
42  
43 mechanisms operating at the individual, group, professional and/or organisational levels  
44  
45 produce context dependent outcomes from EVS (see also Step Six). Patients are not involved  
46  
47 in this review.  
48  
49  
50  
51  
52  
53  
54  
55  
56  
57  
58  
59  
60

### Step One: Locating existing theories

The first step in a realist review is to undertake an initial scoping search to identify theories that begin to explain and develop our understanding of EVS. The importance of this stage is to make visible the underpinning assumptions about why certain components and processes of EVS are required, to get to the one or more desired outcomes.[29]

In the first instance these theories will be located in the following ways: (1) iteratively drawing on exploratory searches of relevant literature and (2) consulting with key content experts who are active in the implementation or use of EVS as part of our stakeholder group engagement. Exploratory literature searches will predominantly use grey literature as a primary source of information- for example we will focus on policy and service documents produced by NHS England and/or Clinical Commissioning Groups on EVS. These documents will be interrogated for theories relating to the practice of EVS and their intended outcomes. This stage is not meant to be exhaustive but instead acts to provide an initial programme theory foundation. Where detail is lacking, we will endeavour to ‘fill in the gaps’ later on in the review.

Secondly, the development of a relevant programme theory will incorporate the iterative discussions within the project team. Regular meetings will be held with the aim of building, sense-making and synthesising a range of different theories into an initial programme theory. Literature, stakeholder engagement and project team discussions, along with the contents of our initial programme theory will all inform the development of an appropriate, comprehensive search strategy to be used in step two.

## Step Two: Searching for evidence

Step two involves one or more formal searches informed by our initial programme theory from step one. Its goal is to identify extant literature that will be able to further inform the development of a more detailed programme theory. The process of designing, piloting and conducting the formal searches will be done with the support of an information specialist. Any modifications made to the search strategies following the pilot will be documented and implemented across source types.

The use of the following databases is anticipated: MEDLINE, EMBASE, The Cochrane Library (Cochrane Database of Systematic Reviews, Cochrane Central Register of Controlled Trials (CENTRAL), Cochrane Methodology Register) and SCOPUS. Any other databases identified by the information specialist as relevant will be incorporated. Forward citation searches and searching the citations contained in the reference lists of relevant documents will also be undertaken. The terminology, syntax and search structure will be informed by step one (i.e. stakeholder collaboration, consultation with preliminary literature and initial programme theory). However we anticipate using the following search terms for EVS within General Practice: delegate\*, home visit\* and house calls. Subject headings relevant to each database will also be used, for example, MeSH for MEDLINE. Grey literature such as evaluations, reports, websites, news articles and leaflets that offer useful contextual and/or conceptual information will also be used.

### Screening

All screening will be undertaken by RA. Initially this will comprise screening of title, abstract and keywords. We will use the following inclusion criteria to determine if a document is likely to contain relevant data:

- Delegated home visiting services within General Practice and its impact on individuals and/or service organisations with a healthcare need. By delegation we are predominantly referring to the range of qualified staff able to undertake a home visit such as other GPs, advanced nurse practitioners, paramedics, nurses and emergency care practitioners.
- Document type: all study designs and documents that indicate they may contain relevant data.
- Types of participants: documents that include housebound (long term and short term) individuals with a healthcare need living within the community.
- Types of intervention: early visiting services; primary care visiting services; acute home visiting services accessed via General Practice within normal surgery hours (8.00-18.30).
- Outcome measures: GP workload, hospital admissions, patient health and/or satisfaction.

During the screening process, documents will be excluded if they relate to any of the following areas as these are outside the role of EVS as defined in the literature:

- Documents relating to home visiting to children as part of routine child health surveillance and maternity at home services
- Documents relating to specialist provision of end of life/ palliative care
- Documents relating to visits provided by out of hours GP co-operatives; out of hours services; (private) social care home visits; extended hours hubs; community-based services not accessed via general practice (e.g. routine district nurse, community-based services)

1  
2  
3 A random sub sample (10%) of the retrieved citations will be allocated and reviewed  
4 independently by SP to ensure consistency in the screening processes. Discussions will take  
5 place between RA and SP for any disagreements regarding the citations. For issues that  
6 cannot be resolved, the wider project team will be consulted.  
7  
8  
9  
10

### 11 *Additional searching*

12  
13  
14  
15 As the aim of the realist review is to include a broad range of documents to further inform the  
16 development of the programme theory, looking across disciplines, for example in relation to  
17 the staffing of EVS is anticipated. Additional searches may be undertaken if there is a gap in  
18 our understanding during the refinement of the programme theory. Any additional searches  
19 that are undertaken will be discussed with the project team, in order to identify and agree on  
20 refined inclusion and exclusion criteria.  
21  
22  
23  
24  
25  
26  
27  
28

### 29 **Step Three: Document selection**

30  
31  
32 The selection of documents will be made in relation to their relevance (contribution to  
33 programme theory development and refinement) and rigour (credibility and trustworthiness  
34 of methods used to generate the data).[29] Documents relating to delegated home visiting  
35 services undertaken in circumstances that closely resemble the UK (i.e. publicly funded  
36 healthcare setting) will be initially prioritised for inclusion and analysis. Studies from other  
37 countries with alternative healthcare structures may be drawn on later to ensure we do not  
38 miss important contributions. Using a similar criteria to Carrieri[27]we define these two  
39 distinctions as having the ability to provide major and minor contributions. Document  
40 inclusion criteria for major contributions includes:  
41  
42  
43  
44  
45  
46  
47  
48  
49  
50  
51  
52  
53  
54  
55  
56  
57  
58  
59  
60

- Documents which contribute to the research questions and are conducted in the NHS.
- Documents which contribute to the research questions and are conducted in circumstances (e.g. publicly funded healthcare systems) with similarities to the NHS.
- Documents which contribute to the research questions and can clearly help to identify mechanisms which could plausibly operate in the circumstances of the NHS (e.g. delegated home visiting services, within hours, to patients with a healthcare need, living within the community).

Minor contributions include:

- Documents conducted in healthcare systems that are markedly different to the NHS (e.g. fee-for service and private insurance scheme systems) but where the mechanisms could plausibly operate in the circumstances of the NHS.

This process, and ensuing discussions will enable reviewers to focus on data extraction and analysis of papers that provide a conceptually rich contribution whilst still including documents that are less conceptually rich. Decisions made regarding these classifications will be discussed by RA and SP using a random 10% selection of articles.

#### **Step Four: Data extraction**

Extraction of the data will be two-fold. Firstly, document characteristics and details will be extracted into an Excel spreadsheet with the aim of providing a descriptive overview of the documents included. Secondly, documents selected for inclusion will be uploaded into NVivo and coded. Details of the analytic processes may be found in step five (data synthesis). Data extraction will also be undertaken by RA and 10% of extracted data will be reviewed independently for consistency by another member of the team. Discussions will take place around any disagreements and extended to the project team where a resolution cannot be found. This process will be documented and the outcomes recorded.

### Step Five: Data synthesis

The aim of data synthesis in realist review is to consolidate the data from previous steps to refine the initial programme theory. Data analysis and synthesis will involve the use of a realist logic analysis with the goal of using the data from the literature (i.e. documents) to further develop the initial programme theory. Analysis requires interpretation and judgement of data. Data coding will be deductive (informed by our initial programme theory), inductive (come from the data within documents) and retroductive (where inferences are made based on interpretations of the data within documents about underlying causal processes – i.e. mechanisms). We will use a series of questions about the relevance and rigour of content within documents as part of our process of analysis, as set out below:

- Relevance: Are sections of text within this document relevant to programme theory development?
- Rigour (judgements about trustworthiness): Are these data sufficiently trustworthy to warrant making changes to any aspect of the programme theory?
- Interpretation of meaning: If the section of text is relevant and trustworthy enough, do its contents provide data that may be interpreted as functioning as context, mechanism or outcome?
- Interpretations and judgements about Context-Mechanism-Outcome-Configurations: What is the Context-Mechanism-Outcome-Configuration (CMOC) (partial or complete) for the data that may be interpreted as functioning as context, mechanism or outcome? Is there further data to inform this particular CMOCs contained within this document or other documents? If so, which other documents? How does this particular CMOC relate to other CMOCs that have already been developed?

- Interpretations and judgements about programme theory: How does this particular (full or partial) CMOC relate to the programme theory? Within this same document are there data which informs how the CMOC relates to the programme theory? If not, is there data in other documents? Which ones? In light of this particular CMOC and any supporting data, does the programme theory need to be changed?

Data to inform our interpretation of the relationships between contexts, mechanisms and outcomes will be sought not just within the same document, but across documents (e.g. mechanisms inferred from one document could help explain the way contexts influenced outcomes in a different document). Synthesising data from different documents is often necessary to compile CMOCs, since not all parts of the configurations will always be articulated in the same document.

Within the analytic process set out above, we will use interpretive cross-case comparison to understand and explain how and why observed outcomes have occurred, for example, by comparing interventions where EVS have been ‘successful’ against those which have not, to understand how context has influenced reported findings. When working through the questions set out above, where appropriate we will use the following forms of reasoning to make sense of the data and refine our programme theory:

- Juxtaposition of data: for example, where data about behaviour change in one document enables insights into data about outcomes in another document.
- Reconciling of data: where data differ in apparently similar circumstances, further investigation is appropriate in order to find explanations for why these differences have occurred.
- Adjudication of data: on the basis of methodological strengths or weaknesses.



- Consolidation of data: where outcomes differ in particular contexts, an explanation can be constructed of how and why these outcomes occur differently.

### **Step Six: Refine programme theory**

The last stage in a realist review is the refinement and testing of the programme theory.[30]

In order to sense-check this, it is advisable to include the expertise of those working in practice or those who can aid in the refinement of the final theory.[31] Therefore our final programme theory will be discussed with those undertaking EVS (e.g. GPs, emergency care practitioners, nurses) and/or those involved in their organisation (GPs, receptionists).

Meetings will be organised with service users and providers to discuss the findings with the goal of asking for their input to develop recommendations that are relevant to them. The active involvement of those involved in EVS is likely to improve how our findings support practice recommendations.[28] If required, the review team will revisit parts of the review that require re-scrutinising. This will be undertaken until no new information is provided by the evidence or stakeholder involvement, essentially reaching theoretical saturation.[26]

This review will follow the Realist and Meta-Review Evidence Synthesis: Evolving Standards (RAMESES) guidelines on quality and reporting.[32]

## **ETHICS AND DISSEMINATION**

### **Ethics**

Formal ethical approval is not required for this review as it is secondary research.

### **Dissemination**

Ensuring that the outputs of this project are useful to the construction of best practice within general practice and commissioning services is a key priority for us. Therefore, we will

1  
2  
3 produce relevant and appropriate outputs that target a range of audiences, in conjunction with  
4  
5 stakeholder consultation:  
6  
7

8 1. Conventional academic forms. We aim to publish in a high-impact peer-reviewed journal  
9  
10 and also present this work at academic conferences. Our hope for this is to initiate a debate  
11  
12 about the use of EVS in primary care.  
13

14  
15 2. Plain English summaries. We aim to provide meaningful summaries of this review's  
16  
17 findings as a method of continuous engagement with different audiences (e.g. doctors,  
18  
19 patients, commissioners and health services). We hope that this will provide an evidence-  
20  
21 based source that can be used to inform the practice and implementation of EVS.  
22  
23

24 Acknowledgements: We would like to thank our Stakeholder Group for their time and  
25  
26 contributions to the refining of our protocol and our reviewers for their positive feedback.  
27  
28

29 Author contributions: RA, GW, KM and SP conceptualised the study. RA designed and wrote  
30  
31 the protocol manuscript. GW, KM, SP, ST,A-MB and NR contributed to protocol  
32  
33 development. GW provided methodological advice. GW and SP critically reviewed and  
34  
35 edited the manuscript. All authors read and approved the final manuscript.  
36  
37

38  
39 Funding: The Evidence Synthesis Working Group is funded by the National Institute for  
40  
41 Health Research School for Primary Care Research (NIHR SPCR) [ProjectNumber 390]. The  
42  
43 views expressed are those of the author(s) and not necessarily those of the NIHR, the NHS or  
44  
45 the Department of Health.  
46  
47

48 Competing interests: KM is Chair, and GW is a Deputy Chair of the United Kingdom's  
49  
50 National Institute of Health Research Health Technology Assessment Primary Care Panel.  
51  
52  
53  
54  
55  
56  
57

## REFERENCES

- 1 CQC. The state of care in NHS acute hospitals: 2014 to 2016. 2017  
[http://www.cqc.org.uk/sites/default/files/20170302b\\_stateofhospitals\\_web.pdf](http://www.cqc.org.uk/sites/default/files/20170302b_stateofhospitals_web.pdf) (accessed May 2018).
- 2 Christensen K, Doblhammer G, Rau R, et al. Ageing populations: the challenges ahead. *Lancet* 2009;374:1196-208.
- 3 Cowling TE, Harris M, Watt H, et al. Access to primary care and the route of emergency admission to hospital: retrospective analysis of national hospital administrative data. *BMJ Qual Saf* 2016;25:432-440.
- 4 Stall N, Nowaczynski M, Sinha SK. Systematic review of outcomes from home-based primary care programs for homebound older adults. *J Am Geriatr Soc* 2014;62:2243-2251.
- 5 Wajnberg A, Wang KH, Aniff M, et al. Hospitalizations and skilled nursing facility admissions before and after the implementation of a home-based primary care program. *J Am Geriatr Soc* 2010;58:1144-1147.
- 6 Sinha SK. Why the elderly could bankrupt Canada and how demographic imperatives will force the redesign of acute care service delivery. *Healthc Pap*. 2011;11:46-51.
- 7 Department of Health, Centre for Workforce Intelligence. In-depth review of the general practitioner workforce: final report. 2014  
[https://assets.publishing.service.gov.uk/government/uploads/system/uploads/attachment\\_data/file/507493/CfWI\\_GP\\_in-depth\\_review.pdf](https://assets.publishing.service.gov.uk/government/uploads/system/uploads/attachment_data/file/507493/CfWI_GP_in-depth_review.pdf) (accessed April 2018).
- 8 Theile G, Kruschinski C, Buck M, et al. Home visits- central to primary care, tradition or an obligation? A qualitative study. *BMC Family Practice* 2011;12:24-35.
- 9 Van den Berg MJ, Cardol M, Bongers FJM, et al. Changing patterns of home visiting in general practice: an analysis of electronic medical records. *BMC Family Practice* 2006;7:58-65.
- 10 Dini L, Sarganas G, Boostrom E, et al. German GPs' willingness to expand roles of physician assistants: a regional survey of perceptions and informal practices influencing uptake of health reforms in primary health care. *Family Practice* 2012;29:448-454.
- 11 Edwards M, Bobb C, Robinson SI. Nurse practitioner management of acute in-hours home visit or assessment requests: a pilot study. *Br J Gen Pract* 2009;59:7-11.
- 12 Van den Berg N, Heymann R, Meinke C, et al. Effect of the delegation of GP-home visits on the development of the number of patients in an ambulatory healthcare centre in Germany. *BMC Health Services Research* 2012;12:355-342.

- 1  
2  
3 13 NHS Oxfordshire CCG, Locality Place Based Primary Care Plan: Oxford City Locality.  
4 2018 [http://www.oxfordshireccg.nhs.uk/documents/work%20programmes/oxford-city-](http://www.oxfordshireccg.nhs.uk/documents/work%20programmes/oxford-city-locality-place-based-plan.pdf)  
5 [locality-place-based-plan.pdf](http://www.oxfordshireccg.nhs.uk/documents/work%20programmes/oxford-city-locality-place-based-plan.pdf) (accessed April 2018).  
6  
7 14 Jiwa M, Bakewell J, Foster S, et al. Primary care visits out-of hours. The case for skill  
8 mix? *J Community Nurs* 2001;15: 4–6.  
9  
10 15 Halter M, Marlow T, Mohammed D, et al. A patient survey of out-of-hours care provided  
11 by Emergency Care Practitioners. *BMC Emerg Med* 2007;7:4-11.  
12  
13 16 Purdy, S. Avoiding hospital admissions What does the research evidence say? *The Kings*  
14 *Fund*, 2010 [https://www.kingsfund.org.uk/sites/default/files/Avoiding-Hospital-Admissions-](https://www.kingsfund.org.uk/sites/default/files/Avoiding-Hospital-Admissions-Sarah-Purdy-December2010_0.pdf)  
15 [Sarah-Purdy-December2010\\_0.pdf](https://www.kingsfund.org.uk/sites/default/files/Avoiding-Hospital-Admissions-Sarah-Purdy-December2010_0.pdf) (accessed April 2018).  
16  
17 17 Liimatta H, Lampela P, Laitinen-Parkkonen P, et al. Effects of preventative home visits on  
18 older people's use and costs of health care services: A systematic review. *European Geriatric*  
19 *Medicine* 2016;7:571-580.  
20  
21 18 Bouman A, van Rossum E, Nelemans P et al. Effects of intensive home visiting programs  
22 for older people with poor health status: A systematic review. *BMC Health Services Research*  
23 2008;8:74-85.  
24  
25 19 van Haastregt JCM, Diederiks JPM, van Rossum E, et al. Effects of preventive home  
26 visits to elderly people living in the community: systematic review. *BMJ* 2000;320:754–8.  
27  
28 20 Mayo-Wilson E., Grant S, Burton J, et al. Preventive home visits for mortality, morbidity,  
29 and institutionalization in older adults: a systematic review and meta-analysis. *PLoS One*  
30 Published Online First: 12 March 2014 <https://doi.org/10.1371/journal.pone.0089257>.  
31  
32 21 Clark J. Preventive home visits to elderly people. *BMJ* 2001;323:708.  
33  
34 22 Moore P. GP pilot set to test if earlier home visits reduces admissions *Pulse* 2017  
35 [http://www.pulsetoday.co.uk/home/finance-and-practice-life-news/gp-pilot-set-to-test-if-](http://www.pulsetoday.co.uk/home/finance-and-practice-life-news/gp-pilot-set-to-test-if-earlier-home-visits-reduces-admissions/20035315.article)  
36 [earlier-home-visits-reduces-admissions/20035315.article](http://www.pulsetoday.co.uk/home/finance-and-practice-life-news/gp-pilot-set-to-test-if-earlier-home-visits-reduces-admissions/20035315.article) (accessed March 2018).  
37  
38 23 Royal College of General Practitioners, Care planning: improving the lives of people with  
39 long term conditions. London: Royal College of General Practitioners, 2011.  
40  
41 24 Jett DU, Grover L and Keck CP. A qualitative study of clinical decision making in  
42 recommending discharge placement from the acute care setting. *Phys Ther* 2003;83:224-236.  
43  
44 25 McDonald R, Waring J, and Harrison S. 'Balancing risk, that is my life': The politics of  
45 risk in a hospital operating theatre department. *Health, Risk and Society* 2005;7:397-411.  
46  
47 26 Pawson R, Greenhalgh T, Harvey G, et al. Realist review—a new method of systematic  
48 review designed for complex policy interventions. *J Health Serv Res Policy* 2005;10 Suppl  
49 1:21–34.  
50  
51  
52  
53  
54  
55  
56  
57  
58  
59  
60

1  
2  
3 27 Carrieri D, Briscoe S, Jackson M et al. 'Care Under Pressure': a realist review of  
4 interventions to tackle doctors' mental ill-health and its impacts on the clinical workforce and  
5 patient care. *BMJ Open* 2018, 8:e021273. doi:10.1136/bmjopen-2017-021273[published  
6 Online First: 5 January 2018].  
7

8  
9 28 Weetman K, Wong G, Scott E et al. Improving best practice for patients receiving hospital  
10 discharge letters: a realist review protocol. *BMJ Open* 2017;7:1-7.  
11

12 29 Pawson R. Digging for Nuggets: how 'Bad' research can yield 'Good' Evidence - in -  
13 international journal of social research methodology. *Int J Soc Res Methodol* 2006;9:127-42.  
14

15 30 Pawson R, Greenhalgh T, Harvey G, et al. Realist Synthesis: An Introduction. 2004  
16 <http://discovery.ucl.ac.uk/180102/> (accessed March 2018).  
17

18 31 Wong G, Brennan N, Mattick K, et al. Interventions to improve antimicrobial prescribing  
19 of doctors in training: the IMPACT (IMProving Antimicrobial presCribing of doctors in  
20 Training) realist review. *BMJ Open* 2015;5:e009059 [published Online First: 22 October  
21 2015].  
22  
23

24 32 Wong G, Greenhalgh T, Westhorp G, et al. Development of methodological guidance,  
25 publication standards and training materials for realist and meta-narrative reviews: the  
26 RAMESES (Realist And Meta-narrative Evidence Syntheses - Evolving Standards) project.  
27 *Health Serv Deliv Res* 2014;2:1-251.  
28  
29  
30  
31  
32  
33  
34  
35  
36  
37  
38  
39  
40  
41  
42  
43  
44  
45  
46  
47  
48  
49  
50  
51  
52  
53  
54  
55  
56  
57  
58  
59  
60
