# Supplementary material for: Understanding the impact of delegated home visiting services accessed via general practice by community-dwelling patients: a realist review protocol
Source: PubMed Central journal article supplement (PMC6252761; doi:10.1136/bmjopen-2018-024876), 2018-11-13
Supplement: bmjopen-2018-024876.reviewer_comments.pdf [file bmjopen-2018-024876.reviewer_comments.pdf]

## PEER REVIEW HISTORY

BMJ Open publishes all reviews undertaken for accepted manuscripts. Reviewers are asked to complete a checklist review form (<http://bmjopen.bmj.com/site/about/resources/checklist.pdf>) and are provided with free text boxes to elaborate on their assessment. These free text comments are reproduced below.

### ARTICLE DETAILS

|                            |                                                                                                                                                      |
|----------------------------|------------------------------------------------------------------------------------------------------------------------------------------------------|
| <b>TITLE (PROVISIONAL)</b> | Understanding the impact of delegated home visiting services accessed via general practice by community dwelling patients: A realist review protocol |
| <b>AUTHORS</b>             | Abrams, Ruth; Wong, Geoffrey; Mahtani, Kamal; Tierney, Stephanie; Boylan, Anne-Marie; Roberts, Nia; Park, Sophie                                     |

### VERSION 1 – REVIEW

|                        |                                                                                                 |
|------------------------|-------------------------------------------------------------------------------------------------|
| <b>REVIEWER</b>        | Sarah Ruiz<br>National Institute on Disability, Independent Living, and Rehabilitation Research |
| <b>REVIEW RETURNED</b> | 12-Jul-2018                                                                                     |

|                         |                                                                                                     |
|-------------------------|-----------------------------------------------------------------------------------------------------|
| <b>GENERAL COMMENTS</b> | This study fills an important gap in the literature by offering a realist review research protocol. |
|-------------------------|-----------------------------------------------------------------------------------------------------|

|                        |                                                             |
|------------------------|-------------------------------------------------------------|
| <b>REVIEWER</b>        | Elizabeth Kaselitz<br>University of Michigan, United States |
| <b>REVIEW RETURNED</b> | 10-Sep-2018                                                 |

|                         |                                                                                                                                                                                                                                                                                                                                                                                                                                                                                              |
|-------------------------|----------------------------------------------------------------------------------------------------------------------------------------------------------------------------------------------------------------------------------------------------------------------------------------------------------------------------------------------------------------------------------------------------------------------------------------------------------------------------------------------|
| <b>GENERAL COMMENTS</b> | <p>This is an exceptionally thorough and well designed study protocol. I have no reservations about accepting it for publication.</p> <p>Two very small comments:<br/>Page 5, lines 12-16. I think this statement needs further explanation or an example on why an RCT design leads to "neglected understanding for justification and benefit". I understand the point you are making, but I think a little further explanation here is warranted.</p> <p>Page 6, line 15 - "indicates"</p> |
|-------------------------|----------------------------------------------------------------------------------------------------------------------------------------------------------------------------------------------------------------------------------------------------------------------------------------------------------------------------------------------------------------------------------------------------------------------------------------------------------------------------------------------|

### VERSION 1 – AUTHOR RESPONSE

Dear Dr Johnson, Dr Ruiz and Dr Kaselitz,

Thank you for your positive feedback on this protocol.

Thank you for your thoughts on the statement regarding RCTs. I have now expanded on this and it reads as follows, on page 5:

This has led to a neglected understanding of their justification and benefit,[21] particularly in relation to contextual factors (such as economic status), patient psycho-social factors (such as, for example social networks) and restricted outcome measures (e.g. mortality rates or function with a specific population).

I have also amended the spelling on Page 6. Thank you for noting this.
